# Supplementary material for: True Molecular Composites: Unusual Structure and Properties of PDMS-MQ Resin Blends
Source: MDPI journal article supplement (doi:10.3390/polym15010048), 2022-12-22
Supplement: s1 [file s1]

## True molecular composites: Unusual ordering

### phenomenon in blended of PDMS - MQ rubbers

Bakirov A.V., Krashenninnikov S.V., Shcherbina M.A., Meshkov I.B., Kalinina A.A., Gorodov V.V.,  
Tatarinova E.A., Muzafarov A.M., Chvalun S.N.

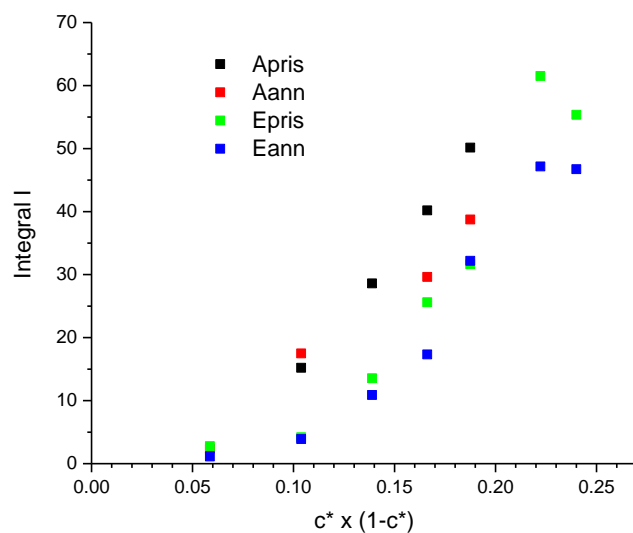

**Figure S1.** Dependence of integral intensity of the SAXS Bragg peak on the  $c^*(1-c)$ , where  $c^*$  is the volume MQ concentration. The linear dependence at higher MQ concentrations means that most of MQ particles participate in knot formation.

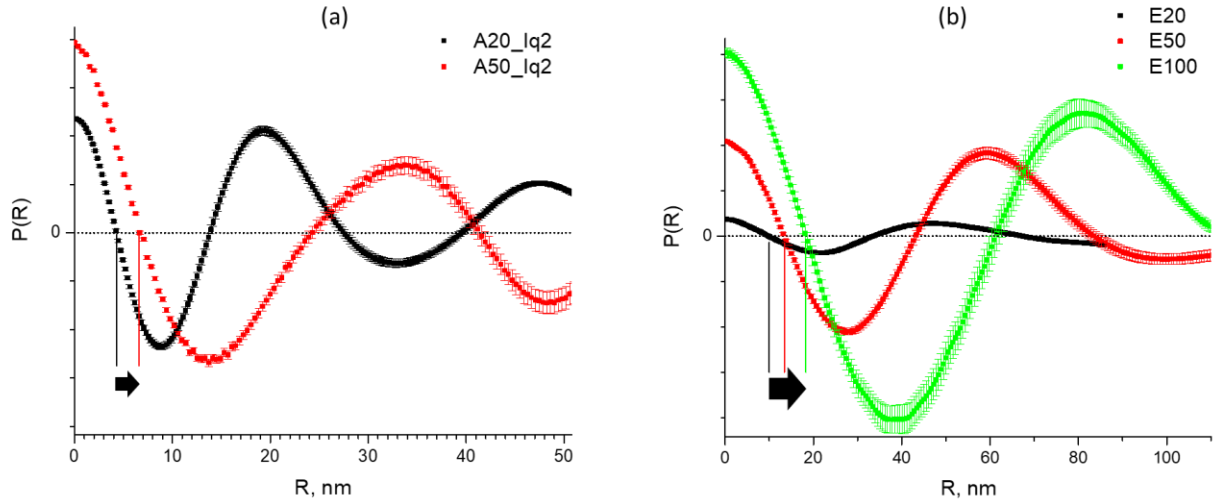

**Figure S2.** Distance distribution function of PDMS-A-MQ/20 and PDMS-A-MQ/50 (a) and PDMS-E-MQ/20, PDMS-E-MQ/50 and PDMS-E-MQ/100 (b). Black arrows indicate the shifting of zero intersection of correlation functions on increasing of the MQ content. Therefore, the size of the scattering cluster (node) increases from 3 to 6.6 nm for PDMS-A and from 10 to 13.4 and further to 18.3 nm for PDMS-E.

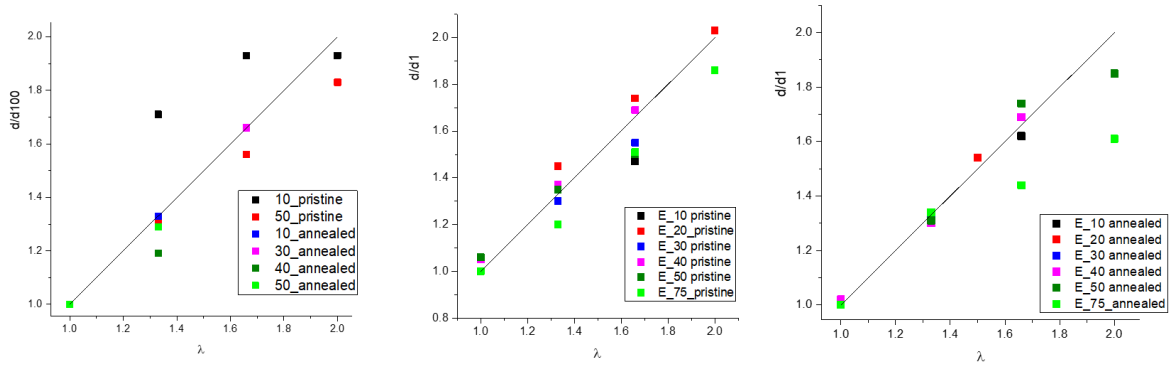

**Figure S3.** Affinity plots for PDMS-A (a), PDMS-E pristine (b) and annealed (c) samples. Black line indicates the fully affine deformation.

**Table S1.** PDMS A - d-spacing upon deformation, nm

| <b>sample</b> | <b>annealed</b> | <b><math>\lambda_i/\lambda_0 = 1</math></b> | <b>1.33</b> | <b>1.66</b> | <b>2</b> | <b>relaxed</b> |
|---------------|-----------------|---------------------------------------------|-------------|-------------|----------|----------------|
| PDMS-A-MQ/10  | -               | 14.7                                        | 25.2        | 28.3        | 28.3     | 24.1           |
| PDMS-A-MQ/10  | +               | 18.0                                        |             |             |          |                |
| PDMS-A-MQ/20  | -               | 20.9                                        |             |             |          |                |
| PDMS-A-MQ/20  | +               | 20.2                                        | 26.8        |             |          |                |
| PDMS-A-MQ/30  | -               | 23.8                                        | 30.8        | 39.4        | -        | 24.1           |
| PDMS-A-MQ/30  | +               | 22.6                                        |             |             |          |                |
| PDMS-A-MQ/40  | -               | 25.9                                        | 30.8        | -           | -        | 25.9           |
| PDMS-A-MQ/40  | +               | 26.0                                        |             |             |          |                |
| PDMS-A-MQ/50  | -               | 31.5                                        | 41.2        | 49.1        | 57.6     |                |
| PDMS-A-MQ/50  | +               | 27.8                                        | 35.8        | -           |          | 27.8           |

**Table S2.** PDMS E – d-spacings upon deformation, nm

| sample        | annealed | $\lambda_i/\lambda_0 = 1$ | 1.33  | 1.66  | 2     | relaxed |
|---------------|----------|---------------------------|-------|-------|-------|---------|
| PDMS-E-MQ/10  | -        | 42.7                      | 58.0  | 62.8  |       | 42.7    |
| PDMS-E-MQ/10  | +        | 44.3                      | 58.1  | 71.8  |       | 44.3    |
| PDMS-E-MQ/20  | -        | 54.8                      | 79.5  | 95.4  | 111.4 | 56.2    |
| PDMS-E-MQ/20  | +        | 50.1                      |       | 77.4  |       |         |
| PDMS-E-MQ/30  | -        | 57.6                      | 74.6  | 89.5  |       | 60.9    |
| PDMS-E-MQ/30  | +        | 57.1                      | 75.8  | 96.6  |       | 57.1    |
| PDMS-E-MQ/40  | -        | 61.7                      | 84.8  | 104.4 |       | 64.8    |
| PDMS-E-MQ/40  | +        | 60.8                      | 78.8  | 102.9 |       | 62.3    |
| PDMS-E-MQ/50  | -        | 66.3                      | 89.4  | 99.1  |       | 70.5    |
| PDMS-E-MQ/50  | +        | 65.9                      | 88.1  | 116.6 |       | 68.3    |
| PDMS-E-MQ/50  | -        | 65.8                      | 87.9  | 116.8 | 158.7 |         |
| PDMS-E-MQ/50  | +        | 64.8                      | 85.0  | 112.4 | 119.7 |         |
| PDMS-E-MQ/75  | -        | 83.8                      | 100.3 | 126.4 | 155.5 | 93.8    |
| PDMS-E-MQ/75  | +        | 82.7                      | 111.0 | 156.3 | 205.2 | 89.8    |
| PDMS-E-MQ/100 | -        | 93.8                      | 134.8 | 208.2 | 257.1 | 148.7   |
| PDMS-E-MQ/100 | +        | 91.1                      | 146.3 | 283.7 | 315.5 | 130.5   |

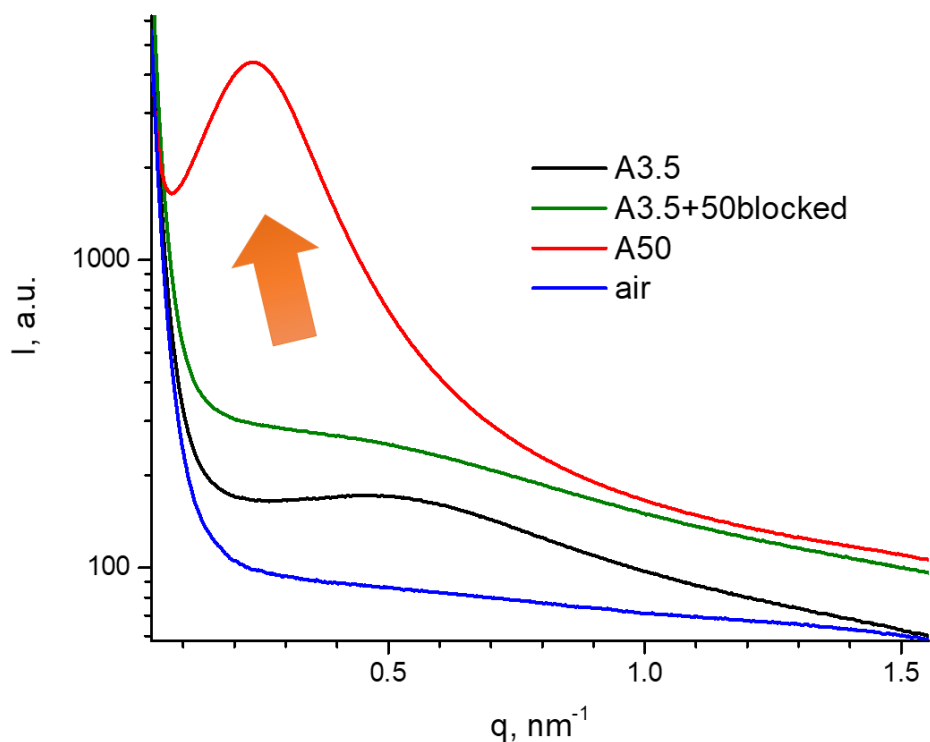

**Figure S4.** SAXS curves for PDMS-A-MQ/3.5 and PDMS-A-MQ/50 (a) and PDMS-A-MQ/50 but blocked hydroxyl groups, preventing interaction between the matrix and the filler(b). Arrow represents the changes in the intensity in logarithmic scale upon adding this interaction

**Table S3.** 2D SAXS images for pristine PDMS-A with varied MQ content upon deformation and following restoration.

| MQ% content | L = 1                                                                               | L = 1.33                                                                           | L = 1.66                                                                             | L = 2                                                                               | restored                                                                              |
|-------------|-------------------------------------------------------------------------------------|------------------------------------------------------------------------------------|--------------------------------------------------------------------------------------|-------------------------------------------------------------------------------------|---------------------------------------------------------------------------------------|
| 10          | 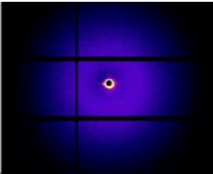   |   |    |  |    |
| 20          |    |   | n/a                                                                                  | n/a                                                                                 |    |
| 30          |    |   | n/a                                                                                  | n/a                                                                                 |    |
| 40          |   |  | n/a                                                                                  | n/a                                                                                 |   |
| 50          |  | n/a                                                                                |  | n/a                                                                                 |  |

**Table S4.** 2D SAXS images for annealed PDMS-A with varied MQ content upon deformation and following restoration.

| MQ%<br>content | L = 1                                                                               | L = 1.33                                                                            | L = 1.66                                                                             | L = 2                                                                                 | restored                                                                              |
|----------------|-------------------------------------------------------------------------------------|-------------------------------------------------------------------------------------|--------------------------------------------------------------------------------------|---------------------------------------------------------------------------------------|---------------------------------------------------------------------------------------|
| 10             | 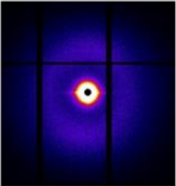   | n/a                                                                                 |    | n/a                                                                                   | n/a                                                                                   |
| 20             |    | n/a                                                                                 |    | n/a                                                                                   | n/a                                                                                   |
| 30             |    | n/a                                                                                 |    | n/a                                                                                   | n/a                                                                                   |
| 40             |   | n/a                                                                                 |   | n/a                                                                                   | n/a                                                                                   |
| 50             |  |  |  |  |  |

**Table S5.** 2D SAXS images for pristine PDMS-E with varied MQ content upon deformation and following restoration. Intensity logarithm was applied to enhance visibility.

| MQ% content | L = 1                                                                               | L = 1.33                                                                            | L = 1.66                                                                             | L = 2                                                                                 | restored                                                                              |
|-------------|-------------------------------------------------------------------------------------|-------------------------------------------------------------------------------------|--------------------------------------------------------------------------------------|---------------------------------------------------------------------------------------|---------------------------------------------------------------------------------------|
| 10          | 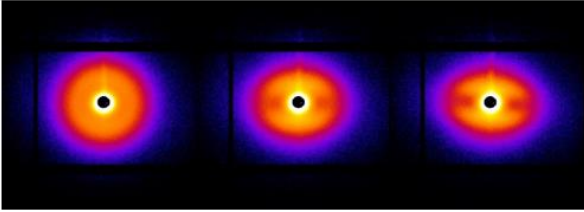  |                                                                                     |                                                                                      | n/a                                                                                   |    |
| 20          |    |    |    |    |    |
| 30          |   |   |   | n/a                                                                                   |   |
| 40          |  |  |  | n/a                                                                                   |  |
| 50          |  |  |  |  |  |
| 75          |  |  |  |  |  |
| 100         |  |  |  |  |  |

**Table S6.** 2D SAXS images for annealed PDMS-E with varied MQ content upon deformation and following restoration. Intensity logarithm was applied to enhance visibility.

| MQ% content | L = 1                                                                               | L = 1.33                                                                            | L = 1.66                                                                             | L = 2                                                                                 | restored                                                                              |
|-------------|-------------------------------------------------------------------------------------|-------------------------------------------------------------------------------------|--------------------------------------------------------------------------------------|---------------------------------------------------------------------------------------|---------------------------------------------------------------------------------------|
| 10          | 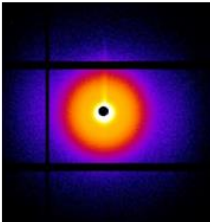   |    |    | n/a                                                                                   |    |
| 20          |    | n/a                                                                                 |    | n/a                                                                                   |    |
| 30          |   |   |   | n/a                                                                                   |   |
| 40          |  |  |  | n/a                                                                                   |  |
| 50          |  |  |  |  |  |
| 75          |  |  |  |  |  |
| 100         |  |  |  |  |  |

**Table S7.** Mechanical properties of PDMS-A and PDMS-E based composites before and after annealing.

| #  | Sample            | $\sigma_{\max}$ , MPa |          | $\varepsilon_b$ , % |        | E, MPa   |          |
|----|-------------------|-----------------------|----------|---------------------|--------|----------|----------|
|    |                   | before                | after    | before              | after  | before   | after    |
| 1  | PDMS-A-MQ/3.5/50* | 0.9±0.1               | 1.6±0.1  | 257±16              | 331±10 | 0.5±0.05 | 0.5±0.05 |
| 2  | PDMS-A-MQ/3.5     | 0.8±0.1               | 0.9±0.1  | 229±11              | 229±11 | 0.5±0.04 | 0.6±0.05 |
| 3  | PDMS-A-MQ/10      | 0.9±0.1               | 2.0±0.1  | 112±8               | 121±8  | 1.2±0.05 | 1.1±0.04 |
| 4  | PDMS-A-MQ/20      | 2.5±0.1               | 4.5±0.1  | 194±16              | 113±7  | 2.5±0.1  | 2.4±0.1  |
| 5  | PDMS-A-MQ/30      | 4.6±0.2               | 4.5±0.1  | 193±12              | 96±12  | 6.5±0.2  | 3.1±0.1  |
| 6  | PDMS-A-MQ/40      | 4.9±0.2               | 7.0±0.3  | 194±18              | 101±9  | 12.8±0.2 | 9.1±0.2  |
| 7  | PDMS-A-MQ/50      | 6.2±0.2               | 10.0±0.4 | 339±24              | 132±11 | 16.0±0.4 | 10.8±0.2 |
| 8  | PDMS-E-MQ/10      | 2.4±0.2               | 1.8±0.1  | 582±32              | 302±12 | 0.7±0.1  | 0.7±0.1  |
| 9  | PDMS-E-MQ/20      | 1.9±0.1               | 4.2±0.2  | 393±19              | 378±20 | 1.7±0.1  | 1.3±0.1  |
| 10 | PDMS-E-MQ/30      | 2.9±0.2               | 5.8±0.3  | 498±22              | 437±14 | 2.3±0.1  | 2.2±0.1  |
| 11 | PDMS-E-MQ/40      | 3.1±0.2               | 8.0±0.3  | 560±24              | 539±22 | 5.2±0.2  | 5.1±0.2  |
| 12 | PDMS-E-MQ/50      | 3.5±0.2               | 8.6±0.2  | 858±39              | 453±20 | 7.0±0.2  | 6.5±0.2  |
| 13 | PDMS-E-MQ/75      | 5.7±0.2               | 7.2±0.3  | 575±15              | 240±11 | 24.4±0.9 | 24.0±0.7 |
| 14 | PDMS-E-MQ/100     | 5.9±0.3               | 6.6±0.2  | 525±19              | 121±9  | 51.0±2.1 | 47.3±1.6 |
